# Supplementary material
Source: publisher figshare collection journal article supplement (https://acs.figshare.com/ndownloader/files/5761395)
Supplement: Supplementary file 1 [file 5761395]

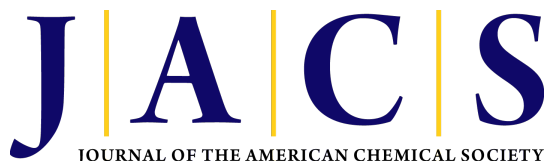

JOURNAL OF THE AMERICAN CHEMICAL SOCIETY

J. Am. Chem. Soc., 1998, 120(36), 9392-9393, DOI:[10.1021/ja982188g](https://doi.org/10.1021/ja982188g)

#### Terms & Conditions

Electronic Supporting Information files are available without a subscription to ACS Web Editions. The American Chemical Society holds a copyright ownership interest in any copyrightable Supporting Information. Files available from the ACS website may be downloaded for personal use only. Users are not otherwise permitted to reproduce, republish, redistribute, or sell any Supporting Information from the ACS website, either in whole or in part, in either machine-readable form or any other form without permission from the American Chemical Society. For permission to reproduce, republish and redistribute this material, requesters must process their own requests via the RightsLink permission system. Information about how to use the RightsLink permission system can be found at <http://pubs.acs.org/page/copyright/permissions.html>

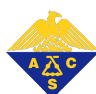

ACS Publications

MOST TRUSTED. MOST CITED. MOST READ.

Copyright © 1998 American Chemical Society

## EXPERIMENTAL

**General Procedures and Methods.**  $^1\text{H}$  NMR spectra were recorded on a Bruker AM400 spectrometer.  $^{13}\text{C}$  NMR spectra were recorded at 100 MHz. Chemical shifts were reported in parts per million (ppm). The residual solvent peak was used as an internal reference. Fast atom bombardment (FAB) mass spectra were obtained with 3-nitrobenzyl alcohol or glycerol as the matrix. Sodium iodide was added when indicated. Chemical ionization (CI) mass spectra were obtained with ammonia as the reagent gas. Fourier transform infrared spectra were obtained as films on sodium chloride plates.

Analytical thin layer chromatography (TLC) was performed with E. Merck pre-coated TLC plates, silica gel 60F-254, layer thickness 0.25 mm. Flash chromatography separations were performed on E. Merck kieselgel 60 (230-400) mesh silica gel.

All reactions were conducted under an argon or nitrogen atmosphere. Reaction vessels were flame-dried or oven-dried and allowed to cool under an inert atmosphere.

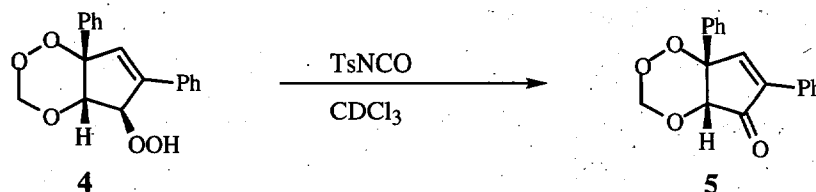

To a solution of hydroperoxide **4** (5.0 mg, 16  $\mu\text{mol}$ ) in  $\text{CDCl}_3$  (0.4 mL) was added TsNCO until TLC indicated complete consumption of starting material. No products of rearrangement were detected by crude  $^1\text{H}$  NMR. The mixture was concentrated and purified by size-exclusion chromatography to give enone **5** (3.3 mg, 70%).

Data for enone **5**:

$^1\text{H}$  NMR ( $\text{CDCl}_3$ ): 7.82 ppm (2H, m), 7.65 (2H, m), 7.50 (2H, t,  $J=7.5$  Hz), 7.49 (1H, s), 7.45 (4H, m), 5.39 (1H, d,  $J=8.0$  Hz), 5.33 (1H, d,  $J=8.0$  Hz), 4.80 (1H, s).

$^{13}\text{C}$  NMR ( $\text{CDCl}_3$ ): 215.25 ppm, 200.57, 147.96, 145.76, 130.37, 129.05, 128.96, 128.85, 127.55, 126.42, 92.59, 84.05, 77.05.

IR (film): 3062  $\text{cm}^{-1}$ , 2926, 2872, 1733, 1495, 1449, 1164, 1074, 965, 761.

HRMS (CI,  $\text{NH}_3$ )  $m/z$  312.1241 ( $\text{M} + \text{NH}_4^+$ ) (calcd. for  $\text{C}_{18}\text{H}_{14}\text{O}_4 + \text{NH}_4$  312.1236).

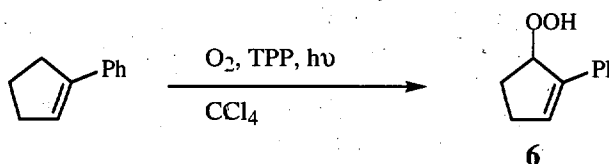

To a 50 mL pear-shaped flask equipped with a reflux condenser and side-arm was added phenylcyclopentene (225 mg, 1.56 mmol),  $\text{CCl}_4$  (15 mL) and TPP (2-3 mg). Oxygen was bubbled via a needle through the flask side-arm, while irradiating the solution at very close distance with a 150W sodium lamp. After 30 min, irradiation was discontinued and the mixture

was concentrated. Silica gel chromatography (8:1 hexanes/ethyl acetate) afforded 2-phenylcyclopentenyl hydroperoxide **6** (160 mg, 58%).

Data for 2-phenylcyclopentenyl hydroperoxide **6**:

$^1\text{H}$  NMR ( $\text{CDCl}_3$ ): 7.56 ppm (2H, br d,  $J=7.1$  Hz), 7.35 (2H, t,  $J=7.7$  Hz), 7.26 (1H, m), 6.54 (1H, t,  $J=2.6$  Hz), 5.53 (1H, dt,  $J=2.2, 7.1$  Hz), 2.69 (1H, m), 2.46 (1H, qt,  $J=2.9, 8.8$  Hz), 2.36 (1H, qt,  $J=2.4, 8.0$  Hz), 2.27 (1H, m).

$^{13}\text{C}$  NMR ( $\text{CDCl}_3$ ): 139.40 ppm, 134.37, 129.50, 128.53, 127.49, 125.97, 90.74, 31.20, 29.10.

IR (film):  $3392\text{ cm}^{-1}$  (broad), 2927, 2854, 1495, 1447, 1330, 1036, 756.

LRMS (EI)  $m/z$  143 ( $\text{M} - 33$ ).

( $\text{Cl}, \text{NH}_3$ )  $m/z$  176 ( $\text{M} + \text{NH}_4^+ - \text{H}_2\text{O}$ ), 194 ( $\text{M} + \text{NH}_4^+$ ).

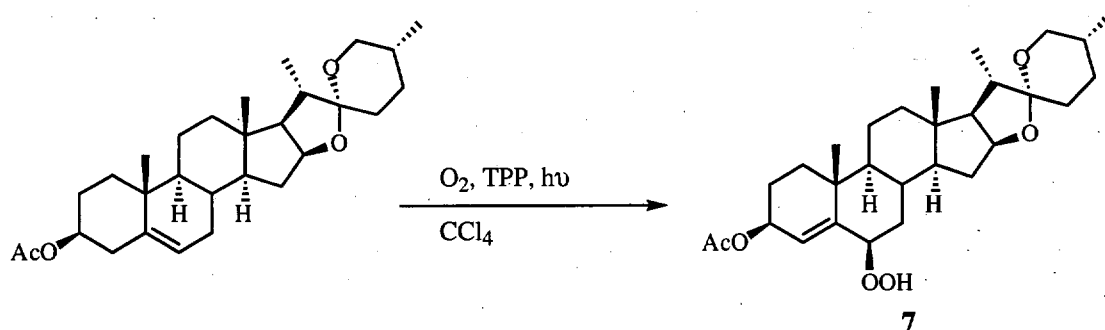

To a 50 mL pear-shaped flask equipped with a reflux condenser and side-arm was added 3-acetyl diosgenin (167 mg, 0.37 mmol),  $\text{CCl}_4$  (11 mL) and TPP (2.2 mg). Oxygen was bubbled via a needle through the flask side-arm, while irradiating the solution at very close distance with a 150W sodium lamp for 2 h. Concentration, followed by silica gel chromatography (5:1 hexanes-EtOAc) afforded a mixture of three hydroperoxides (120 mg). Slow evaporation of this mixture from hexanes-EtOAc yielded **7** (10 mg), as white crystals.

Data for diosgenin hydroperoxide **7**:

$^1\text{H}$  NMR ( $\text{CDCl}_3$ ): 7.64 ppm (1H, s), 5.60 (1H, br s), 5.23 (1H, br t,  $J=7.5$  Hz), 4.39 (1H, q,  $J=7.5$  Hz), 4.33 (1H, br s), 3.47 (1H, dd,  $J=3.0, 10.0$  Hz), 3.36 (1H, t,  $J=10.9$  Hz), 2.06 (3H, s), 2.04-0.98 (22H, m), 0.96 (3H, d,  $J=6.9$  Hz), 0.78 (9H, m).

$^{13}\text{C}$  NMR ( $\text{CDCl}_3$ ): 170.94 ppm, 143.62, 128.78, 109.27, 86.56, 80.61, 70.54, 66.85, 62.00, 55.92, 53.69, 41.60, 40.45, 39.66, 36.68, 36.28, 35.46, 31.60, 31.33, 30.37, 30.27, 28.75, 24.74, 21.37, 20.52, 20.18, 17.11, 16.39, 14.47.

IR (film):  $3344\text{ cm}^{-1}$  (br), 2950, 2873, 2861, 1734, 1455, 1374, 1240, 1175, 1156, 1052, 1031, 980, 898, 866, 756.

LRMS (FAB, NaI)  $m/z$  511 ( $\text{M} + \text{Na}^+$ ).

HRMS (FAB, NaI)  $m/z$  511.3048 ( $\text{M} + \text{Na}^+$ ) (calcd. for  $\text{C}_{29}\text{H}_{44}\text{O}_6\text{Na}$  511.3036).

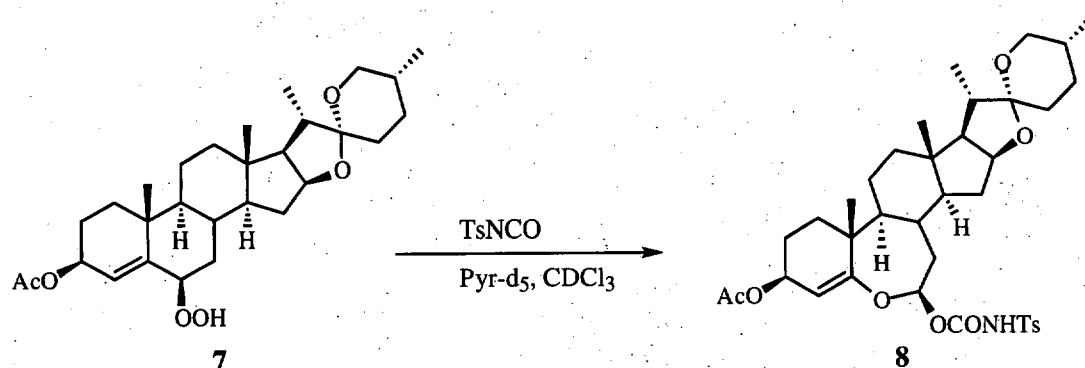

To a solution of diosgenin hydroperoxide **7** (2.2 mg, 4.5  $\mu\text{mol}$ ) in  $\text{CDCl}_3$  (0.4 mL) was added  $\text{TsNCO}$  (3  $\mu\text{L}$ , 20  $\mu\text{mol}$ ). When TLC indicated complete consumption of starting material (no enone could be detected by crude  $^1\text{H}$  NMR), the mixture was concentrated and purified by size-exclusion chromatography to give ring-expanded carbamate enol ether **8** (2.6 mg, 84%).

In a separate run, the presence of pyridine- $\text{d}_5$  was shown to have no effect on the outcome of reaction.

Data for diosgenin-derived carbamate **8**:

$^1\text{H}$  NMR ( $\text{CDCl}_3$ ): 7.93 ppm (2H, d,  $J=8.3$  Hz), 7.43 (1H, br s), 7.35 (2H, d,  $J=8.3$  Hz), 6.01 (1H, br s), 5.33 (1H, d,  $J=4.5$  Hz), 5.19 (1H, m), 4.36 (1H, dt,  $J=7.5$ , 6.3 Hz), 3.47 (1H, dd,  $J=3.0$ , 10.0 Hz), 3.36 (1H, t,  $J=10.9$  Hz), 2.45 (3H, s), 2.00 (3H, s), 2.00-1.10 (22H, m), 1.01 (3H, s), 0.97 (3H, d,  $J=6.9$  Hz), 0.84 (3H, s), 0.80 (3H, d,  $J=6.3$  Hz).

$^{13}\text{C}$  NMR ( $\text{CDCl}_3$ ): 170.63 ppm, 162.44, 145.20, 135.42, 129.76, 128.29, 112.96, 109.04, 97.05, 79.79, 67.42, 66.89, 62.49, 54.96, 48.25, 41.81, 40.84, 40.71, 39.41, 35.32, 32.56, 31.88, 31.47, 30.61, 30.27, 29.69, 28.80, 23.95, 22.07, 21.69, 21.27, 20.04, 17.14, 16.32, 14.55.

IR (film): 3228  $\text{cm}^{-1}$  (br), 2951, 2927, 2878, 2854, 1734, 1455, 1353, 1241, 1167, 1092, 1056, 1018, 977, 898, 762.

LRMS (FAB, NaI)  $m/z$  708 ( $\text{M} + \text{Na}^+$ ).

HRMS (FAB, NaI)  $m/z$  708.3184 ( $\text{M} + \text{Na}^+$ ) (calcd. for  $\text{C}_{37}\text{H}_{51}\text{NO}_9\text{SNa}$  708.3182).

## Crystal Structure Information

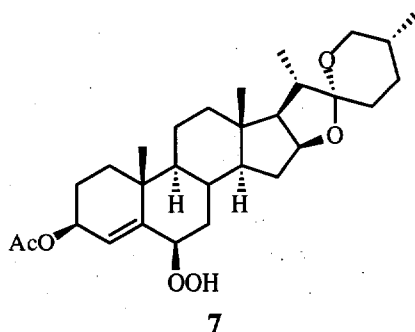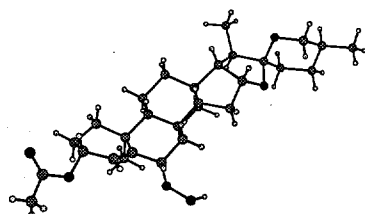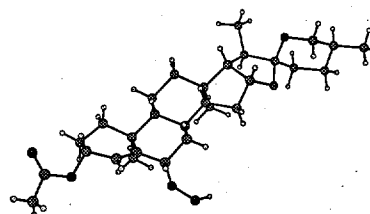

### Crystal data and structure refinement for 7:

|                                   |                                                                                                                            |
|-----------------------------------|----------------------------------------------------------------------------------------------------------------------------|
| Empirical formula                 | C <sub>29</sub> H <sub>44</sub> O <sub>6</sub>                                                                             |
| Formula weight                    | 488.64                                                                                                                     |
| Temperature                       | 213(2) K                                                                                                                   |
| Wavelength                        | 0.71073 Å                                                                                                                  |
| Crystal system, space group       | Monoclinic, P2(1)                                                                                                          |
| Unit cell dimensions              | a = 10.7818(15) Å    alpha = 90 deg.<br>b = 9.4792(13) Å    beta = 107.805(3) deg.<br>c = 13.8552(18) Å    gamma = 90 deg. |
| Volume                            | 1348.2(3) Å <sup>3</sup>                                                                                                   |
| Z, Calculated density             | 2, 1.204 Mg/m <sup>3</sup>                                                                                                 |
| Absorption coefficient            | 0.082 mm <sup>-1</sup>                                                                                                     |
| F(000)                            | 532                                                                                                                        |
| Crystal size                      | 0.20 x 0.10 x 0.05 mm                                                                                                      |
| Theta range for data collection   | 1.54 to 22.50 deg.                                                                                                         |
| Index ranges                      | -11 ≤ h ≤ 11, -10 ≤ k ≤ 10, -9 ≤ l ≤ 14                                                                                    |
| Reflections collected / unique    | 5777 / 3411 [R(int) = 0.0962]                                                                                              |
| Completeness to 2theta = 22.50    | 99.8%                                                                                                                      |
| Refinement method                 | Full-matrix least-squares on F <sup>2</sup>                                                                                |
| Data / restraints / parameters    | 3411 / 1 / 316                                                                                                             |
| Goodness-of-fit on F <sup>2</sup> | 1.161                                                                                                                      |
| Final R indices [I > 2sigma(I)]   | R1 = 0.0828, wR2 = 0.1413                                                                                                  |
| R indices (all data)              | R1 = 0.1678, wR2 = 0.1826                                                                                                  |
| Absolute structure parameter      | -1(3)                                                                                                                      |
| Largest diff. peak and hole       | 0.206 and -0.283 e.Å <sup>-3</sup>                                                                                         |
